# Supplementary material for: The biobehavior, biocompatibility and theranostic application of SPNS and Pd@Au nanoplates in rats and rabbits
Source: PubMed Central journal article supplement — Chem Sci. 2018 Nov 26;10(6):1677–86. doi: 10.1039/c8sc04318c (PMC6368216; doi:10.1039/c8sc04318c), 2018-11-26
Supplement: SC-010-C8SC04318C-s001.pdf [file SC-010-C8SC04318C-s001.pdf]

## Supporting Information

### The biobehavior, biocompatibility and theranostic application of SPNS and Pd@Au nanoplates in rats and rabbits

#### Contents:

**Figure S1:** The photos of rabbit orthotopic liver tumor, rats orthotopic liver tumor and subcutaneous tumor.

**Figure S2:** The molar absorption coefficients of SPNS at different wavelengths.

**Figure S3:** The TEM image of Pd@Au-PEG.

**Figure S4:** The TEM image of Pd@Au-PEG after laser irradiation.

**Figure S5:** The biodistribution results of SPNS and Pd@Au in rats and rabbits calculated in % ID.

**Figure S6:** The accumulation amount changes of SPNS in rats' kidney.

**Figure S7:** The excretion of Pd@Au by feces.

**Figure S8:** The loading efficiencies of Cy5.5 on SPNS and Pd@Au.

**Figure S9:** The color changes of rat subcutaneous tumors after intravenous injection of SPNS-PEG.

**Figure S10:** The color changes of rat subcutaneous tumors after intravenous injection of Pd@Au-PEG.

**Figure S11:** Cellular uptake of SPNS and Pd@Au by W256 cells.

**Figure S12:** Cellular uptake of SPNS and Pd@Au by VX2 cells.

**Figure S13:** PTT efficiency for *in vitro* killing VX2 cells.

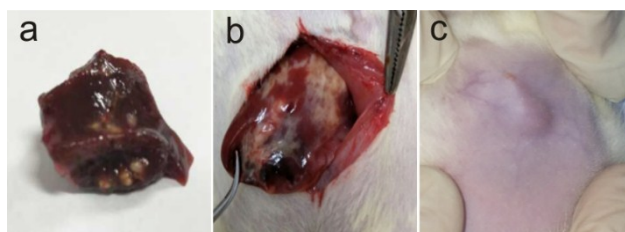

**Figure S1:** The photos of (a) rabbit orthotopic liver tumor, (b) rats orthotopic liver tumor and (c) subcutaneous tumor.

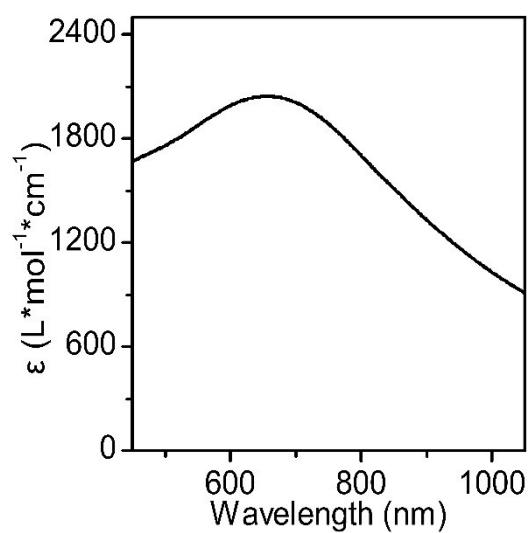

**Figure S2:** The molar absorption coefficients of SPNS at different wavelengths (Concentration of SPNS: 40 ppm).

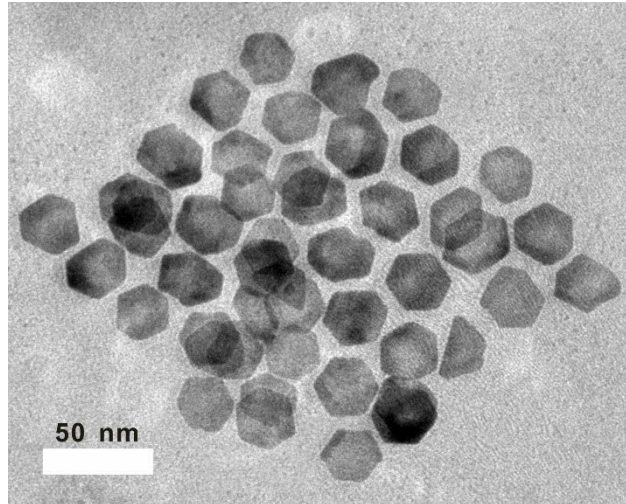

**Figure S3:** The TEM image of Pd@Au-PEG.

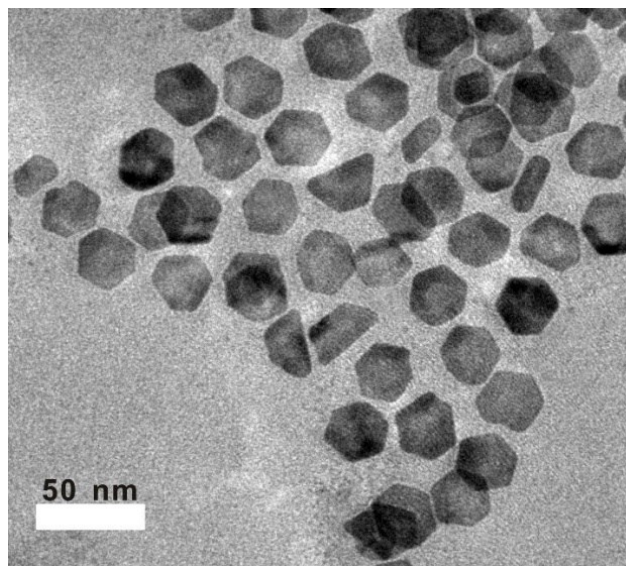

**Figure S4:** The TEM image of Pd@Au-PEG after laser irradiation (0.5 W/cm<sup>2</sup>, 10 min).

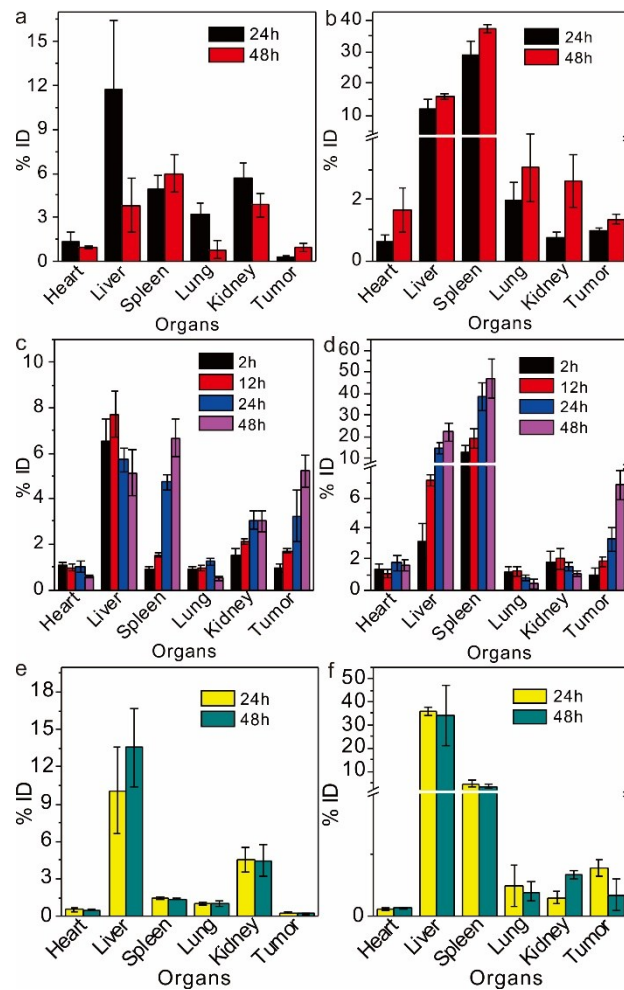

**Figure S5:** The biodistribution of SPNS and Pd@Au calculated in % ID. (a) SPNS and (b) Pd@Au in orthotopic liver tumor-bearing rats; (c) SPNS and (d) Pd@Au in subcutaneous tumor-bearing rats; (e) SPNS and (f) Pd@Au in orthotopic liver tumor-bearing rabbits.

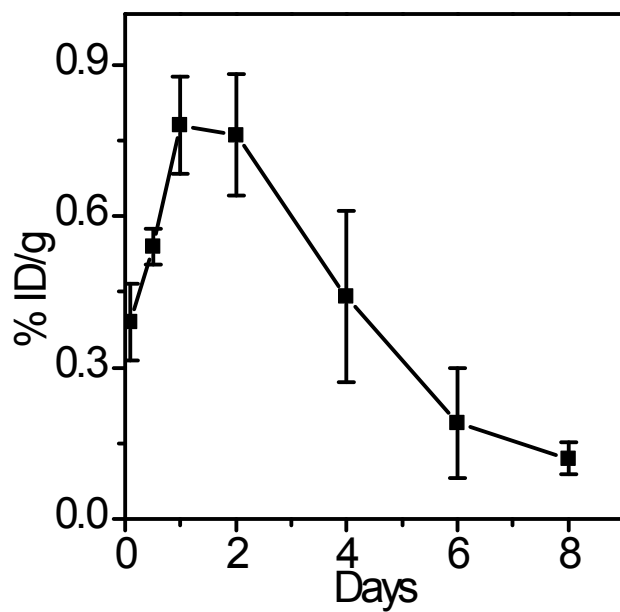

**Figure S6:** The accumulation amount changes of SPNS in rats' kidney.

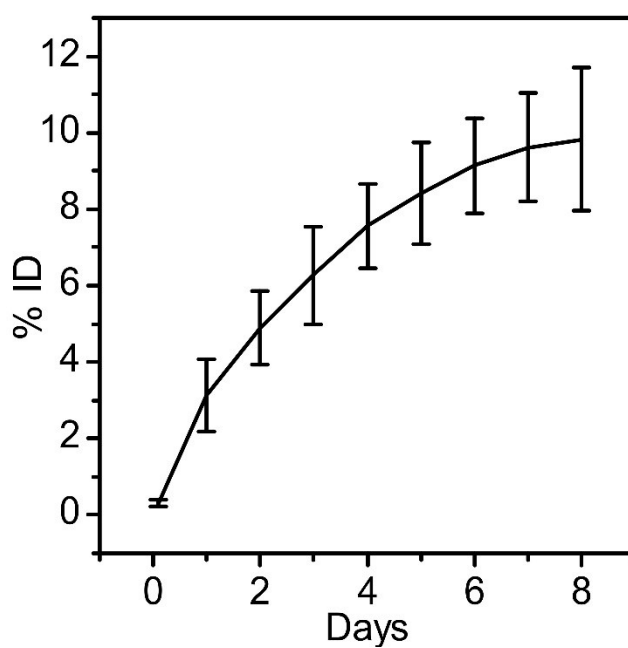

**Figure S7:** The excretion of Pd@Au by feces.

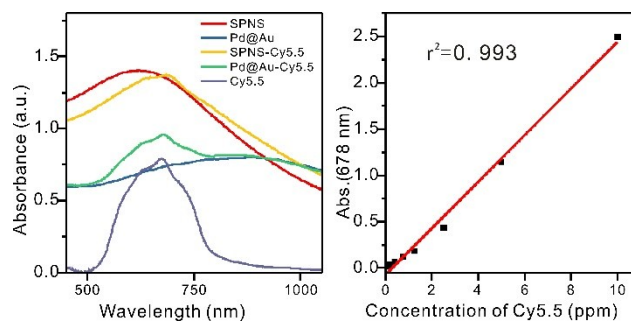

**Figure S8:** The loading efficiencies of Cy5.5 on SPNS and Pd@Au. (a) UV-Vis-NIR absorption spectra of SPNS, SPNS-Cy5.5, Pd@Au, Pd@Au-Cy5.5 and Cy5.5. (b) The standard absorption curve of Cy5.5 at 678 nm.

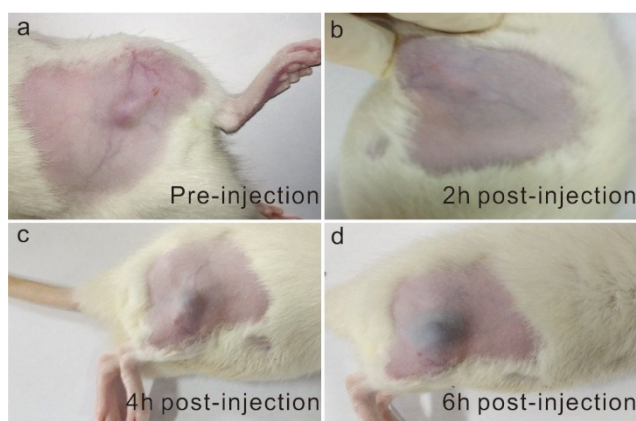

**Figure S9:** The color changes of rat subcutaneous tumors after intravenous injection of SPNS-PEG.

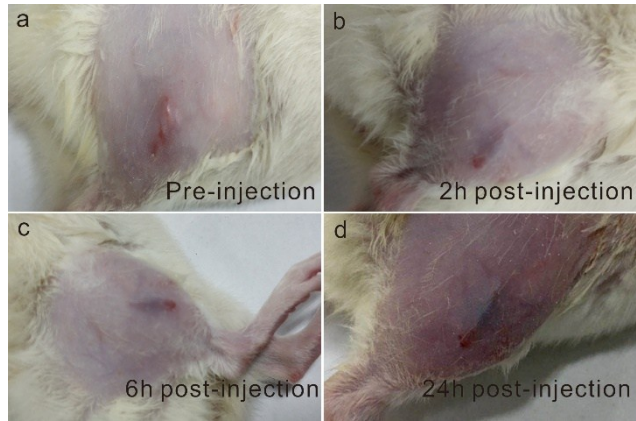

**Figure S10:** The color changes of rat subcutaneous tumors after intravenous injection of Pd@Au-PEG.

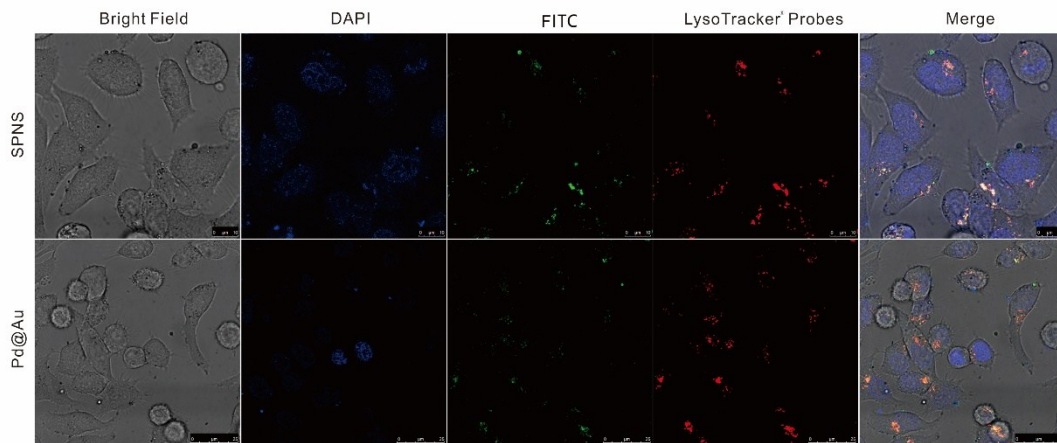

**Figure S11:** Cellular uptake of SPNS and Pd@Au by W256 cells.

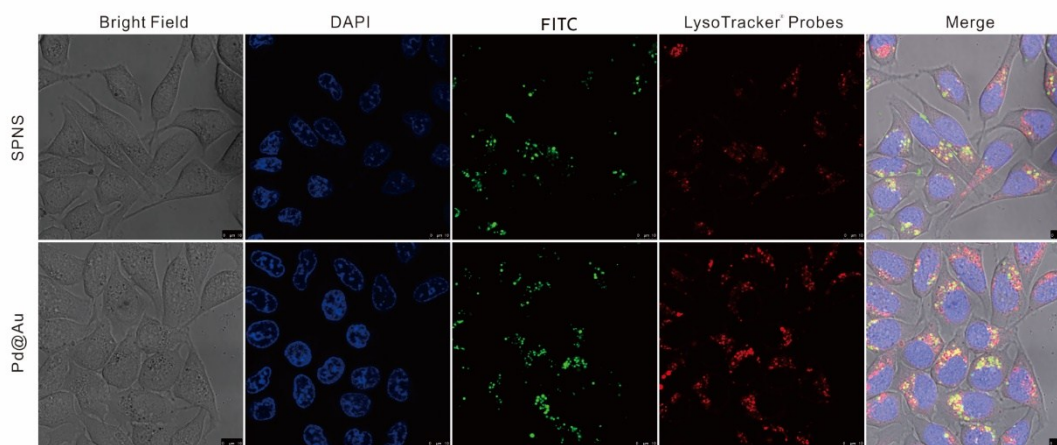

**Figure S12:** Cellular uptake of SPNS and Pd@Au by VX2 cells.

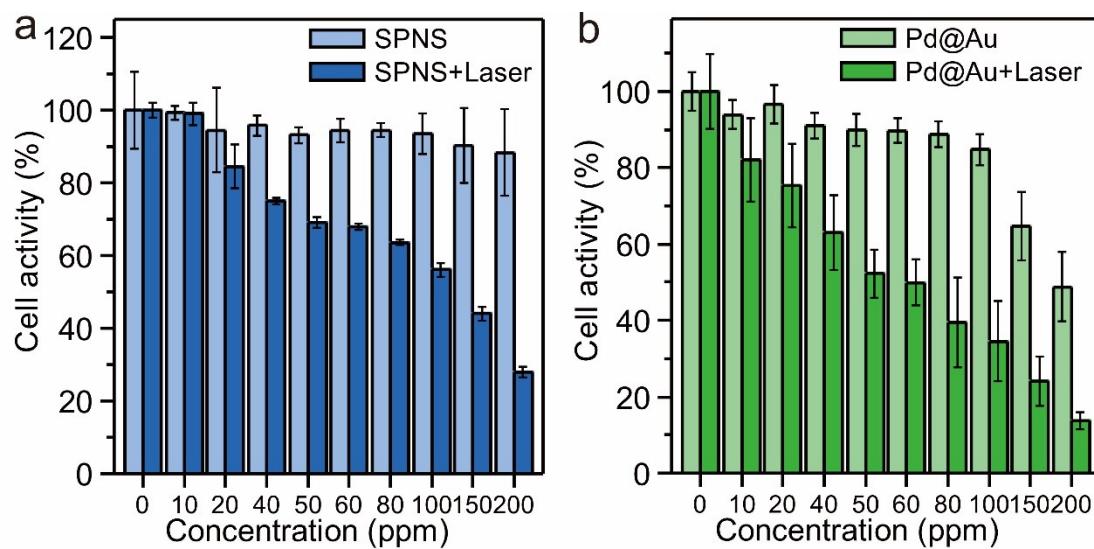

**Figure S13:** PTT efficiency of (a) SPNS and (b) Pd@Au for *in vitro* killing VX2 cells.
